# Supplementary material
Source: publisher figshare collection journal article supplement (https://frontiersin.figshare.com/ndownloader/files/27567521)
Supplement: Supplementary file 1 [file 27567521]

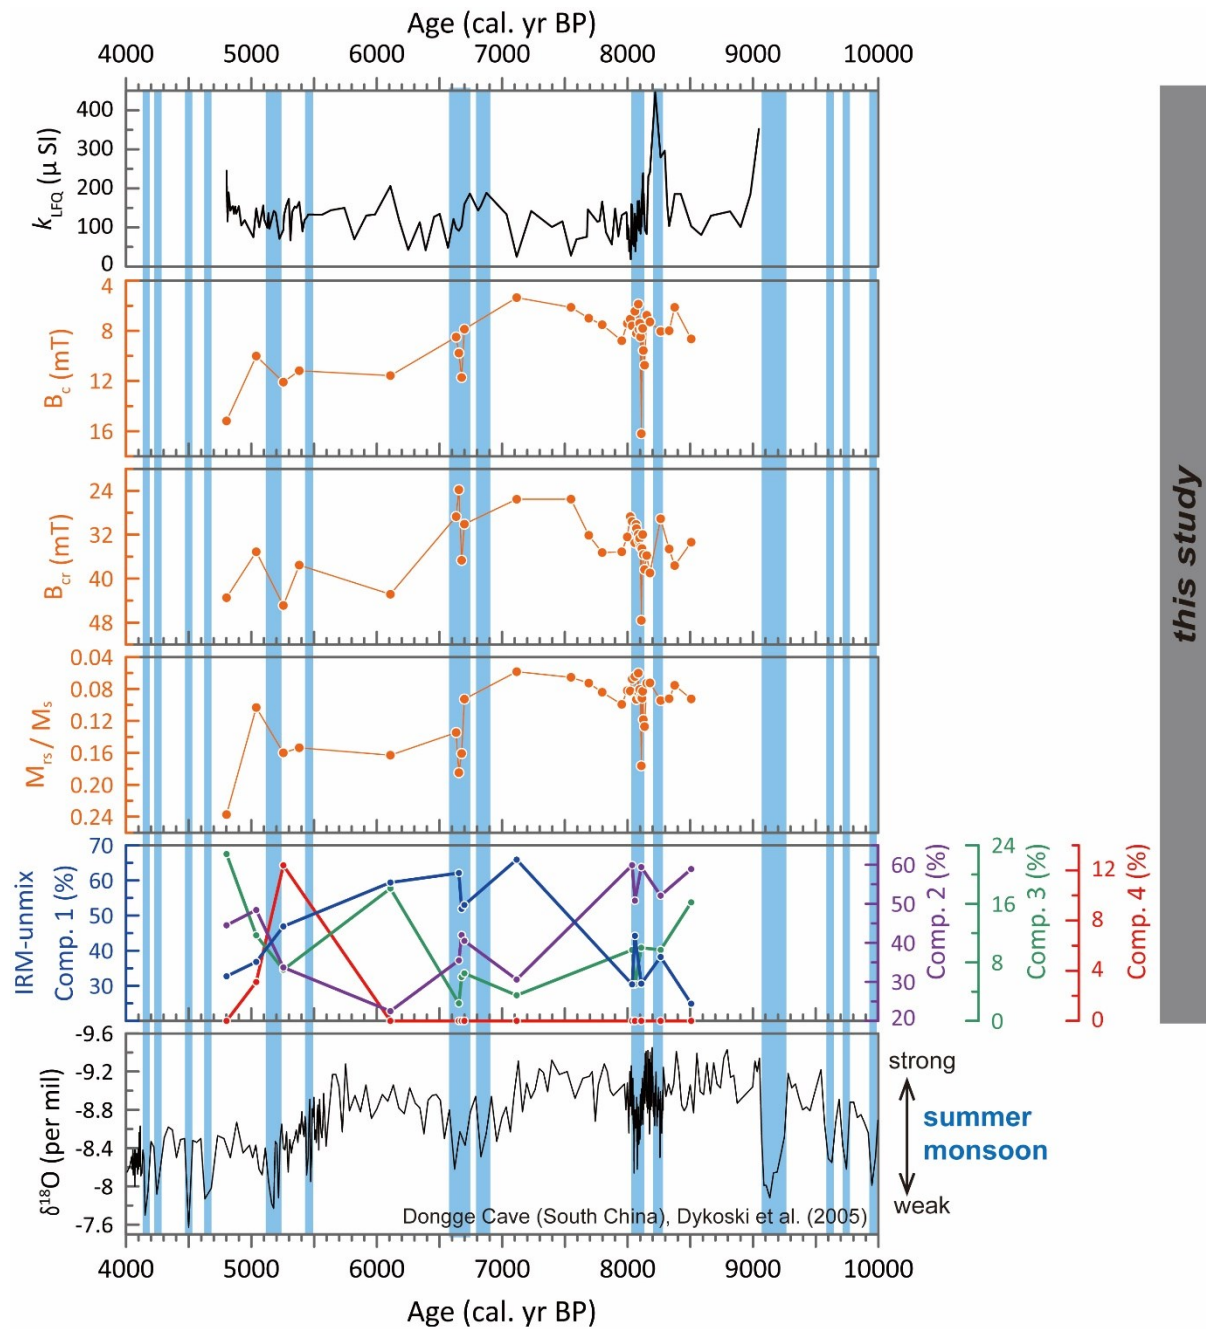

**Figure S3.** Comparisons between stalagmite  $\delta^{18}\text{O}$  from Dongge Cave (Dykoski et al., 2005) as a summer EAM index and some selective magnetic properties presented in this study (see text for details). Unusual high-magnitude short-term (centennial) excursions to high  $\delta^{18}\text{O}$  values indicating weak summer monsoon are indicated by blue shading.
